# Supplementary material for: Bispecific antibodies in multiple myeloma treatment: A journey in progress
Source: PubMed Central journal article supplement (PMC9623099; doi:10.3389/fonc.2022.1032775), 2022-10-18
Supplement: Table_1.pdf [file Table_1.pdf]

**Supplementary Table 1. Summary of clinical trials of BiTE/BiAb (Out of pipeline).**

| Agents (target)                                        | Trial and participant data                                                                                                                                                                                                                                                                          | Protocol                                                                                                                                                                                                                                                                              | Efficacy                                                                                                                                                                                                                                                             | Safety                                                                                                                                                                                                                                                                                                                                                                                                                                                |
|--------------------------------------------------------|-----------------------------------------------------------------------------------------------------------------------------------------------------------------------------------------------------------------------------------------------------------------------------------------------------|---------------------------------------------------------------------------------------------------------------------------------------------------------------------------------------------------------------------------------------------------------------------------------------|----------------------------------------------------------------------------------------------------------------------------------------------------------------------------------------------------------------------------------------------------------------------|-------------------------------------------------------------------------------------------------------------------------------------------------------------------------------------------------------------------------------------------------------------------------------------------------------------------------------------------------------------------------------------------------------------------------------------------------------|
| Pacanalotamab<br>(AMG 420,<br>BI 836909)<br>BCMA x CD3 | <ol style="list-style-type: none"> <li>Phase 1 trial (NCT02514239)</li> <li>RRMM, n= 42</li> <li>Median age: 65 (range: 39-79).</li> <li>Prior lines of Tx: 5</li> <li>HR cytogenetics: 33%</li> <li>Prior daratumumab: 29%</li> <li>Prior elotuzumab: 10%</li> <li>Prior auto-HSCT: 86%</li> </ol> | <ol style="list-style-type: none"> <li>Dose escalation study.</li> <li>Six-week cycles of AMG 420 up to 10 cycles (4 weeks continuous IV infusion + 2 weeks off).</li> <li>Single-patient cohorts [0.2–1.6 µg/day (d)] followed by cohorts of 3–6 patients (3.2–800 µg/d).</li> </ol> | <ol style="list-style-type: none"> <li>ORR: 31% (13/42).</li> <li>Responses (+) at 6.5 µg/d.</li> <li>Median time to response: 1.4 months.</li> <li>ORR at 400 µg/d: 70% (7/10), including 5 MRD-negative CRs, 1 VGPR, and 1 PR.</li> </ol>                          | <ol style="list-style-type: none"> <li>SAE: 20 (48%), including infection (n= 14) and polyneuropathy (n= 2).</li> <li>CRS: 16, including 2 Gr 2 and 1 Gr 3.</li> <li>No Gr≥ 3 CNS toxicities.</li> <li>DLT (+): 2 patients (2/3, at 800µg/d)</li> </ol>                                                                                                                                                                                               |
| Pavurutamab<br>(AMG 701)<br>BCMA x CD3                 | <ol style="list-style-type: none"> <li>Phase 1 (NCT03287908)</li> <li>RRMM, n= 75</li> <li>Median age: 63 years</li> <li>Prior lines of Tx: 6 (1-25)</li> <li>EMD: 27%</li> <li>Prior HSCT: 83%</li> <li>Prior anti-CD38 MoAb: 93%</li> <li>Triple refractory: 68%</li> </ol>                       | <ol style="list-style-type: none"> <li>AMG 701 IV infusions: weekly in 4-week cycles until PD.</li> <li>Target doses (mg): 0.14, 0.4, 0.8, 1.2, 1.6, 3.0, 4.5, 6.5, 9, 12.</li> </ol>                                                                                                 | <ol style="list-style-type: none"> <li>ORR: 36% (16/45) at doses of 3-12 mg.</li> <li>ORR: 83% (5/6, 3 PRs, 2 VGPRs) (earlier dose escalation with 9 mg).</li> <li>Median time to response: 1.0 month.</li> <li>MRD in 4 CR patients: all negative (4/4).</li> </ol> | <ol style="list-style-type: none"> <li>Hematological AEs: anemia (43%), neutropenia (23%), and thrombocytopenia (20%).</li> <li>Non-hematological AEs: CRS (61%), diarrhea (31%), fatigue (25%), and fever (25%).</li> <li>All Gr 3 CRS (n= 5, 7%) were assessed as DLTs.</li> <li>SAE (n= 29, 39%): infections (n= 13), CRS (n= 7), and asymptomatic pancreatic enzyme rise (n= 2).</li> <li>Neurotoxicity: 6 (4 CRS-related, all Gr 1/2)</li> </ol> |

AE, adverse event; CNS, central nervous system; CR, complete remission; CRS, cytokine releasing syndrome; DLT, dose-limiting toxicity; EMD, extramedullary disease; Gr, grade; HR, high-risk; HSCT, hematopoietic stem cell transplantation; IV, intravenous; MoAb, monoclonal antibody; MRD, minimal residual disease; ORR, overall (objective) response rate; PR, partial response; SAE, serious AE; Tx, treatment; VGPR, very good partial response.
